# Supplementary material for: Unexpected Mutations by CRISPR-Cas9 CTG Repeat Excision in Myotonic Dystrophy and Use of CRISPR Interference as an Alternative Approach
Source: PubMed Central journal article supplement — Mol Ther Methods Clin Dev. 2020 May 22;18:131–44. doi: 10.1016/j.omtm.2020.05.024 (PMC7321784; doi:10.1016/j.omtm.2020.05.024), 2020-05-22
Supplement: mmc1.pdf [file mmc1.pdf]

**Supplemental Information**

**Unexpected Mutations by CRISPR-Cas9 CTG**

**Repeat Excision in Myotonic Dystrophy and Use**

**of CRISPR Interference as an Alternative Approach**

**Miki Ikeda, Mariko Taniguchi-Ikeda, Takema Kato, Yasuko Shinkai, Sonoko Tanaka, Hiroki Hagiwara, Naomichi Sasaki, Toshihiro Masaki, Kiichiro Matsumura, Masahiro Sonoo, Hiroki Kurahashi, and Fumiaki Saito**

Figure S1

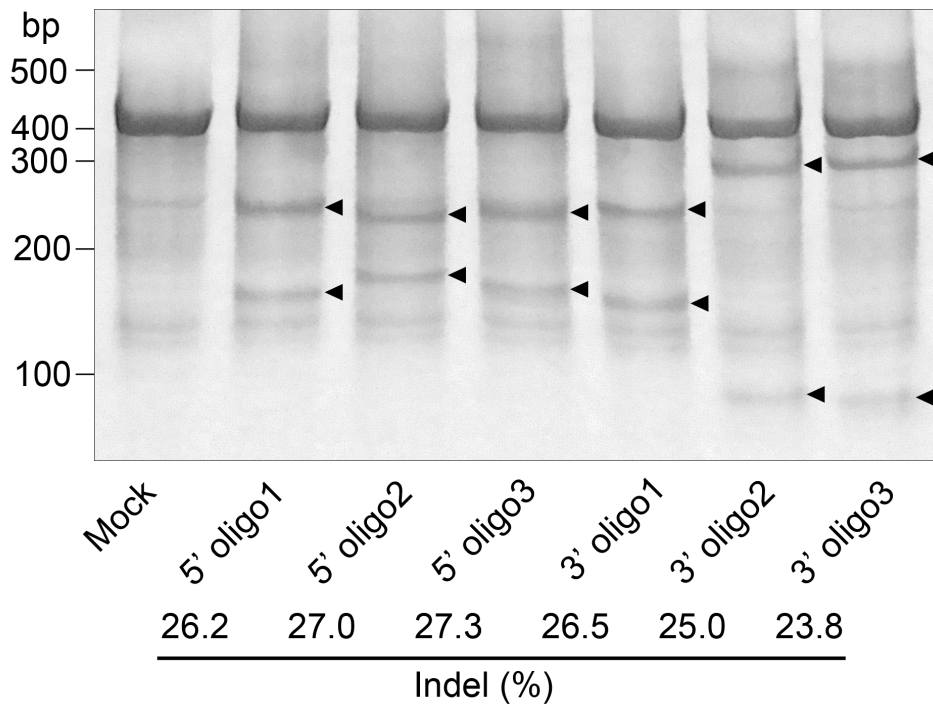

Figure S1. Evaluation of the DSB formation by Cas9 nuclease. The sgRNAs designed at the 3' UTR of the *DMPK* gene were examined for the efficiency of the formation of DSBs using a T7 endonuclease 1 assay. The indel frequencies of sgRNAs were estimated to be 20-30% using the HEK293 cells. Arrowheads indicate the bands generated by the digestion following the indel formation.

Figure S2

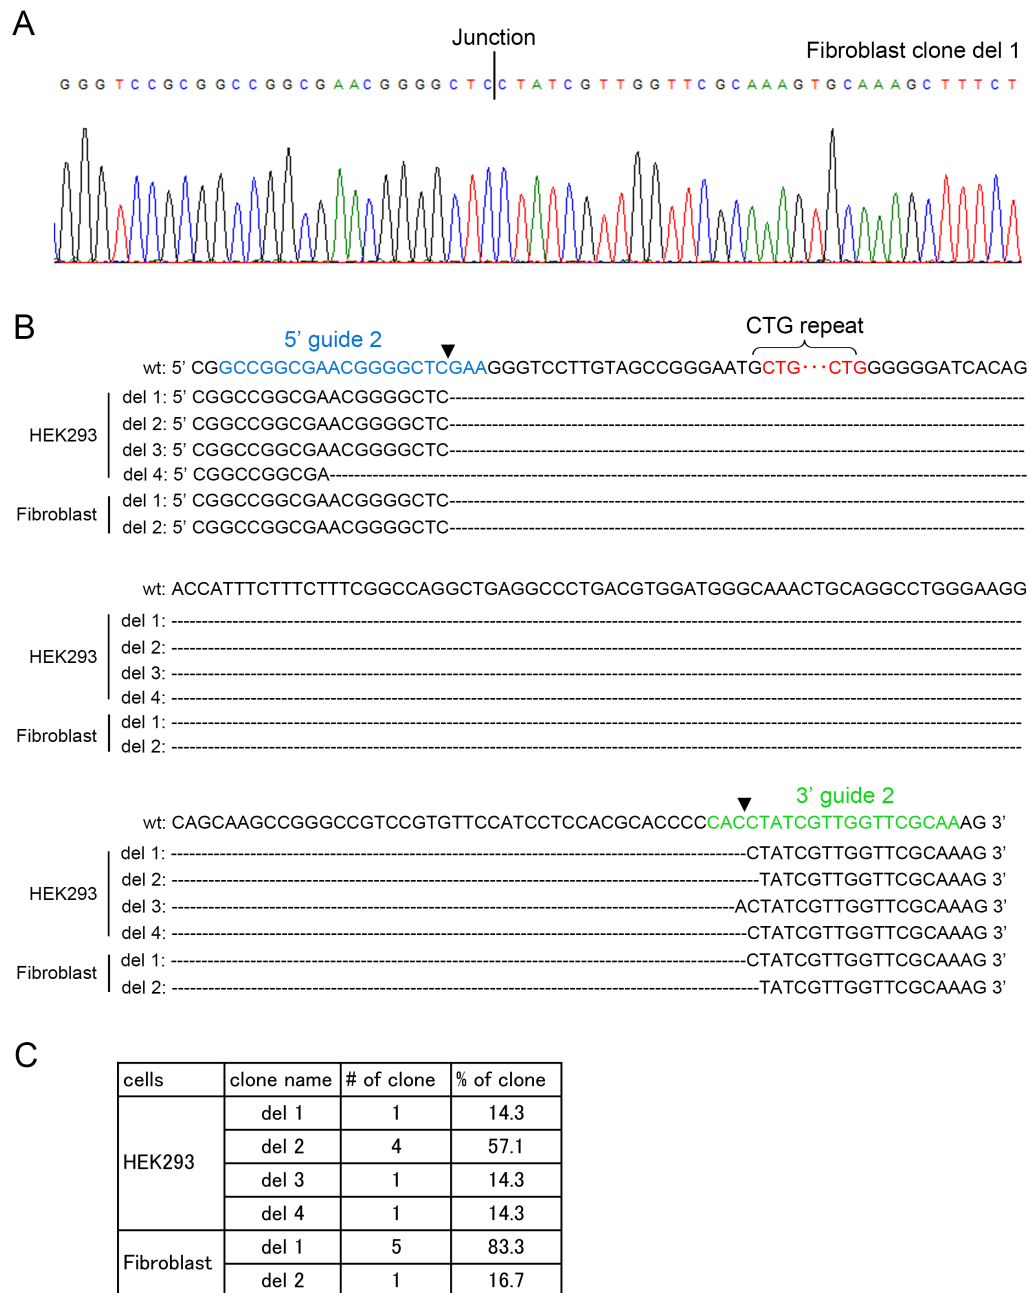

Figure S2. Sequence of the 3' UTR of the *DMPK* gene after the excision of the CTG repeat with Cas9 nuclease. (A) A result of Sanger sequencing, encompassing the junction region of type del 1 in the fibroblast GM03991, is shown. (B) By sequencing the clones obtained from the amplicon of the lower bands, several junctional sequences (del 1 to 4 for HEK293 cells, del 1 and 2 for fibroblasts) were observed. Arrowheads indicate the position of the expected DSBs. (C) The frequencies of each junction were calculated. The junctional sequences were mostly homogeneous.

Figure S3

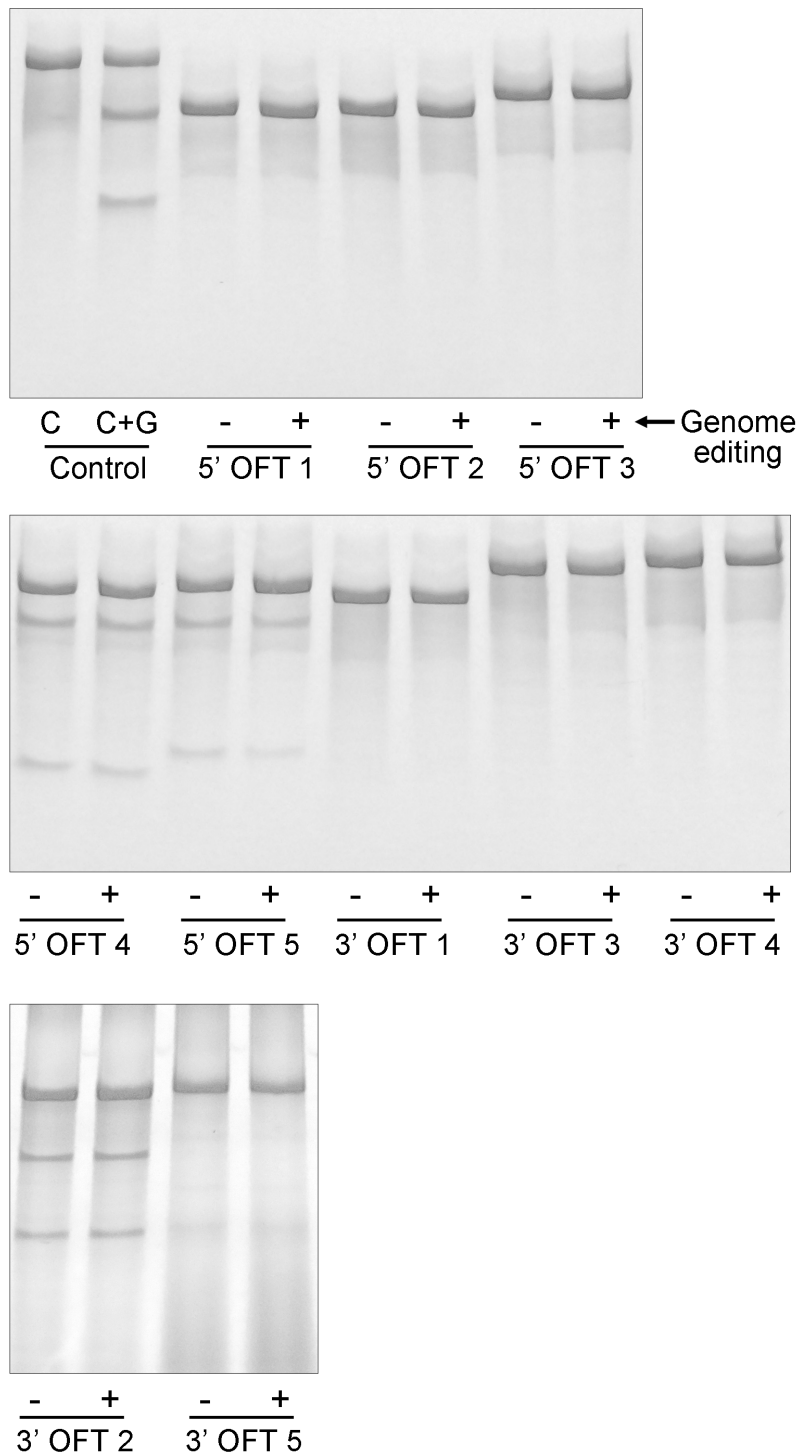

Figure S3. Assessment of the off-target effects using a T7 endonuclease 1 assay. The fibroblast GM03991 was co-transfected with the 5' guide 3 and 3' guide 2. The top 5 predicted off-target sites for each sgRNA were amplified by PCR. The T7 endonuclease 1 assay showed no obvious off-target indels at these sites.

Figure S4

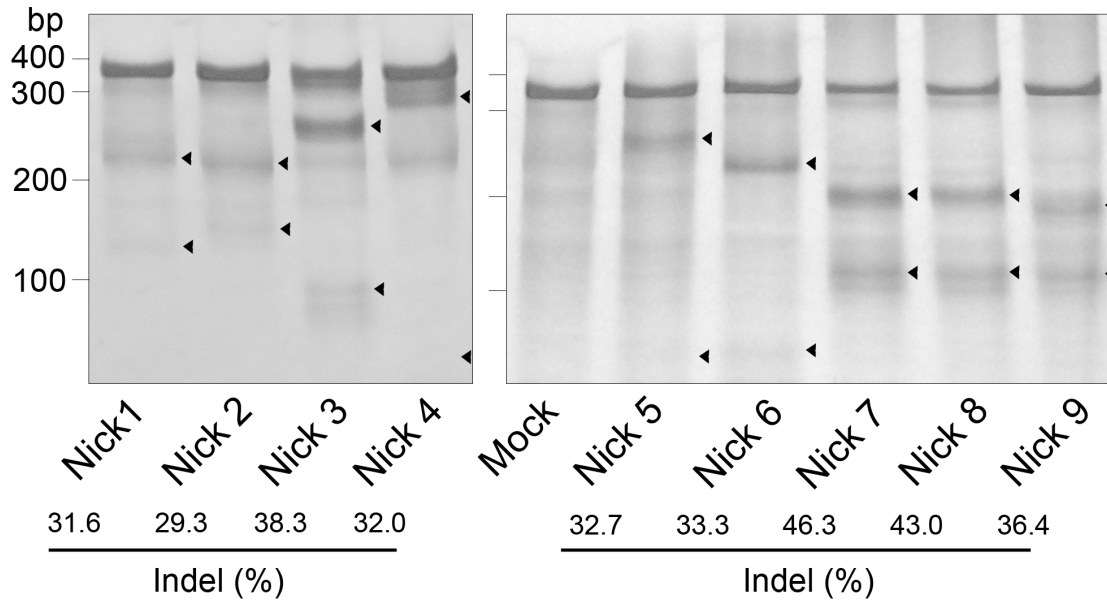

Figure S4. Evaluation of the DSB formation by the double nicking strategy using Cas9 nickase. The nicking pairs of sgRNAs designed at the 3' UTR of the *DMPK* gene were examined for the efficiency of the formation of DSBs using a T7 endonuclease 1 assay. The indel frequencies of each nicking pairs were estimated to be 30% to over 40% using the HEK293 cells. Arrowheads indicate the bands generated by the digestion following the indel formation.

Figure S5

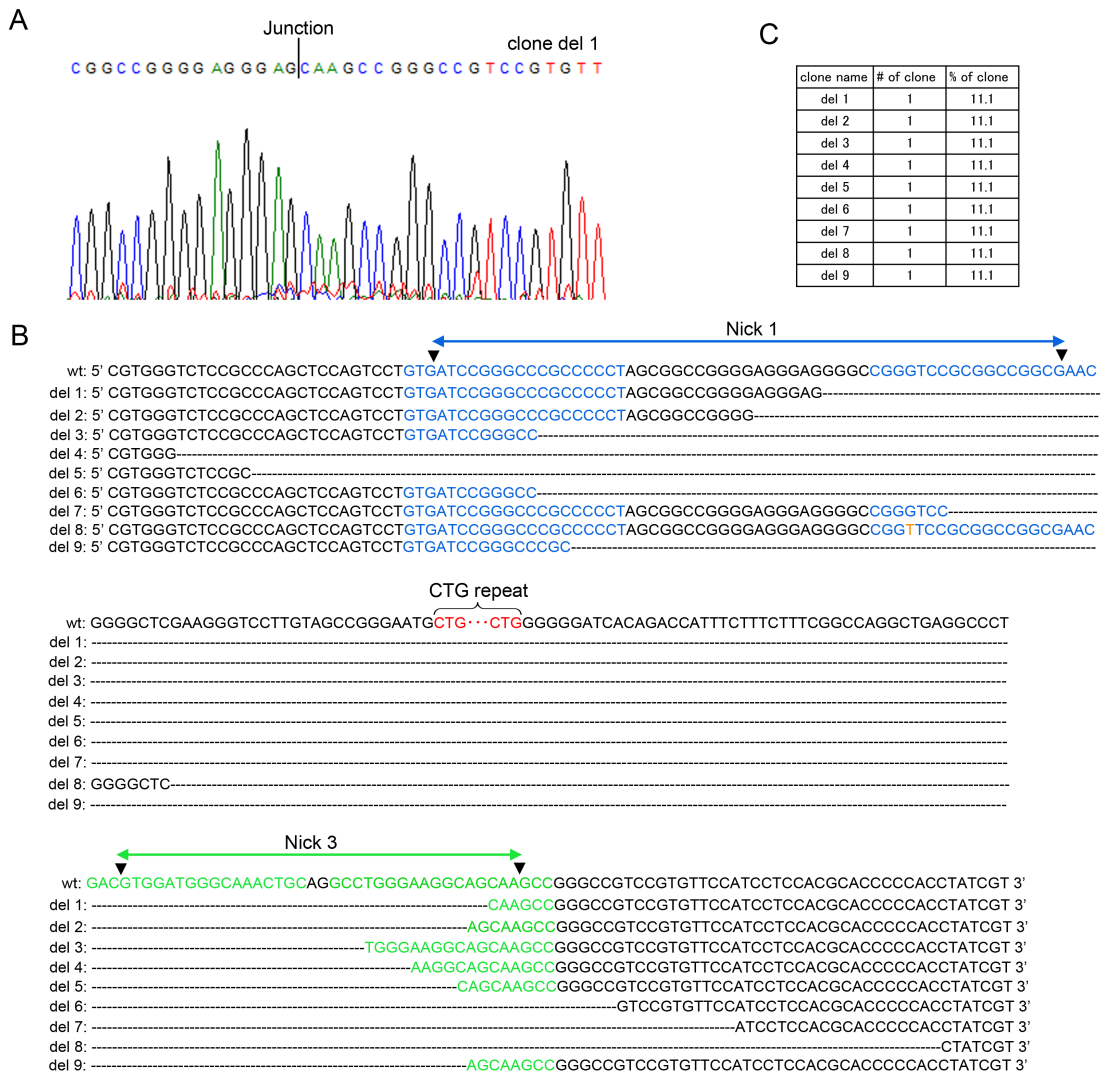

Figure S5. Sequence of the 3' UTR of the *DMPK* gene after the excision of the CTG repeat with the double nicking strategy. (A) A result of Sanger sequencing, encompassing the junction region of type del 1 in the HEK293 cell is shown. (B) By sequencing the clones obtained from the amplicon of the lower bands, several junctional sequences (del 1 to 9) were observed. Arrowheads indicate the position of the expected nicks. (C) The frequencies of each junction were calculated. The junctional sequences were heterogeneous, and no identical sequence was observed among the clones we tested.

Figure S6

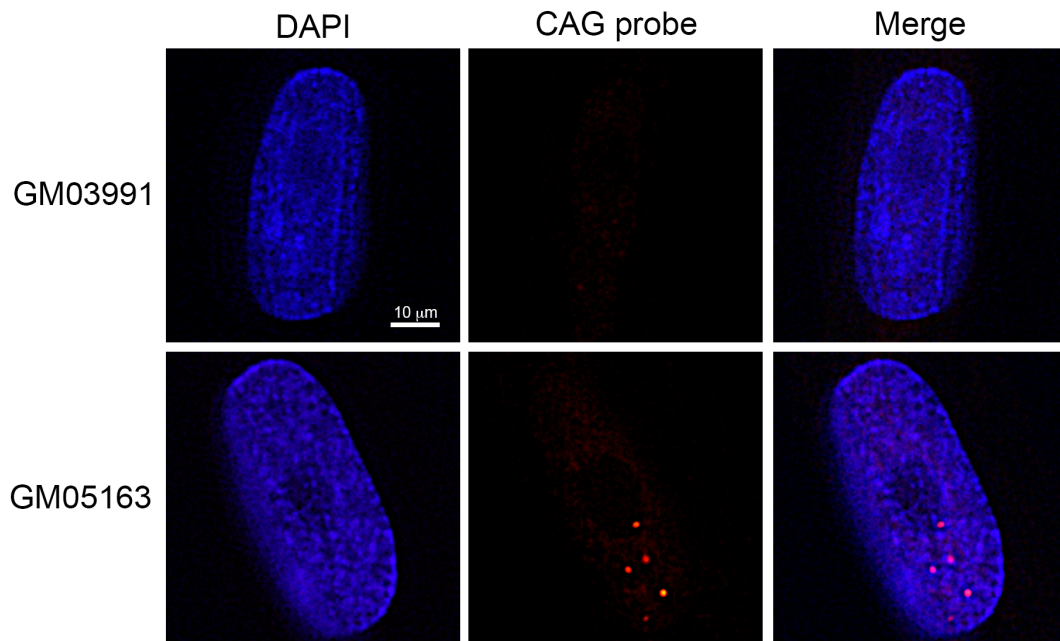

Figure S6. RNA-FISH assay using the fibroblasts derived from DM1 patients. The RNA-FISH assay revealed several intense intranuclear RNA foci in the fibroblast GM05163 but not in GM03991. This result indicates that the length of 50 to 80 CTG repeats are not enough to generate the RNA foci.

Figure S7

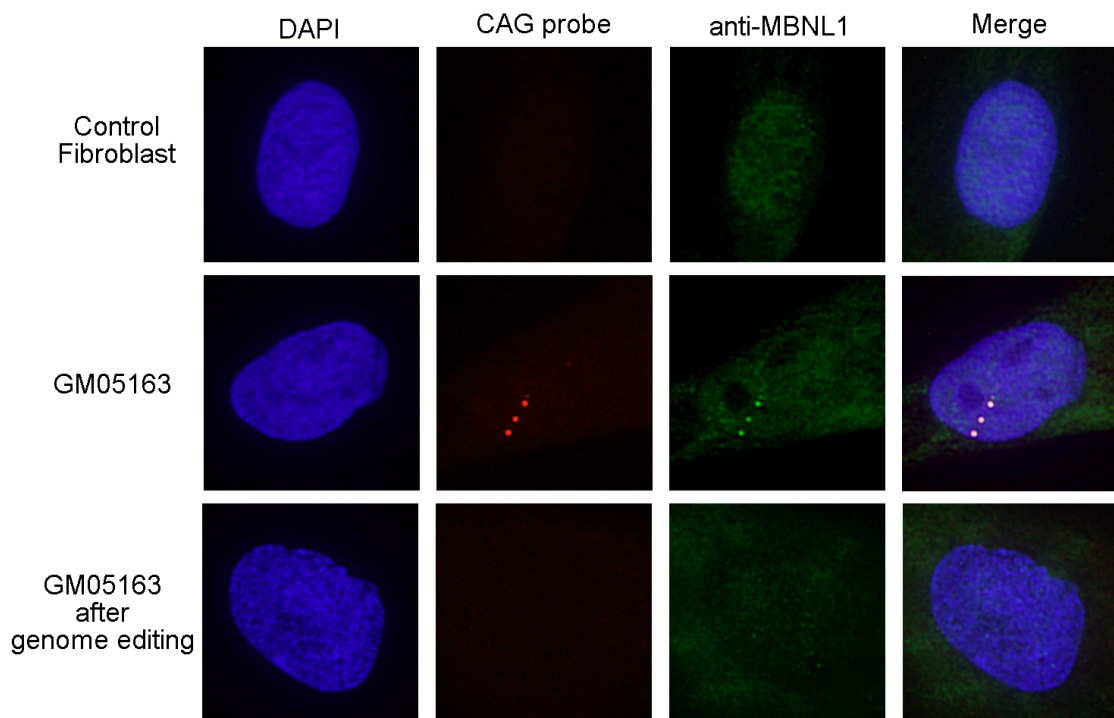

Figure S7. Colocalization of MBNL 1 with RNA foci. The RNA-FISH assay was followed by the immunofluorescent analysis using an anti-MBNL 1 antibody. The MBNL 1 signals were observed to colocalize with the RNA foci in the fibroblast GM05163. Upon genome editing using Cas9 nuclease, both signals were abolished, indicating that the sequestered MBNL 1 was released from the foci.



Figure S8

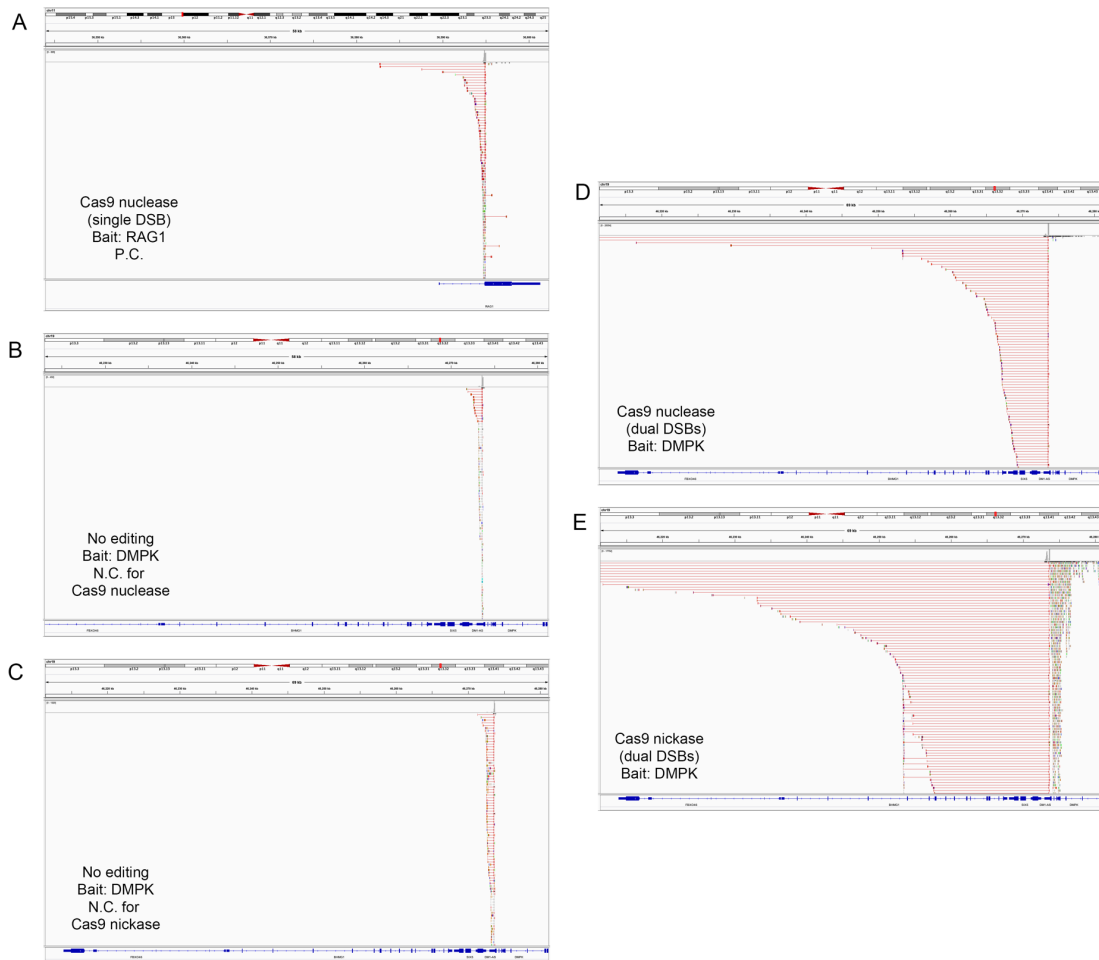

Figure S8. Mapping of the paired reads obtained by LAM-HTGTS using the integrative genomics viewer software. The snapshots show the reads as pairs sorted by their insert size. (A) Upon a generation of a single DSB at the *RAG1* locus, the left-sided reads of some of the paired reads were mapped several kb apart from the breakpoint. The non-edited samples using *DMPK* as a bait, which were used as negative controls for Cas9 nuclease (B) and Cas9 nickase (C), exhibited only minimal gaps between the paired reads. Dual DSBs generated by both Cas9 nuclease (D) and Cas9 nickase (E), especially the latter, resulted in much larger gaps between the paired reads. These large gaps indicate that genomic rearrangements occurred including large deletions. P.C.; positive control, N.C.; negative control.

Table S1

| Frequency of translocation |            |          |            |           |                |                                        |                                           |
|----------------------------|------------|----------|------------|-----------|----------------|----------------------------------------|-------------------------------------------|
| RAG1 Cas9 nuclease         |            |          |            |           |                |                                        |                                           |
| Translocation hot-spot     | Bait       |          | Prey       |           | Count of Reads | Frequency in total split reads (1137)  | Frequency in total mapped reads (2476303) |
|                            | chromosome | position | chromosome | position  |                |                                        |                                           |
| #1                         | 11         | 36594900 | 7          | 155931000 | 3              | 0.263852%                              | 0.000121%                                 |
|                            | 11         | 36594900 | 7          | 155931100 | 3              | 0.263852%                              | 0.000121%                                 |
| #2                         | 11         | 36594900 | 12         | 47002900  | 8              | 0.703606%                              | 0.000323%                                 |
|                            | 11         | 36594900 | 12         | 47003000  | 9              | 0.791557%                              | 0.000363%                                 |
| #3                         | 11         | 36594900 | 15         | 75746500  | 10             | 0.879507%                              | 0.000404%                                 |
|                            | 11         | 36594900 | 15         | 75746600  | 4              | 0.351803%                              | 0.000162%                                 |
|                            | 11         | 36594900 | 15         | 75746700  | 5              | 0.439754%                              | 0.000202%                                 |
| #4                         | 11         | 36594900 | 19         | 1417400   | 12             | 1.055409%                              | 0.000485%                                 |
|                            | 11         | 36594900 | 19         | 1417500   | 8              | 0.703606%                              | 0.000323%                                 |
|                            | 11         | 36594900 | 19         | 1417600   | 3              | 0.263852%                              | 0.000121%                                 |
| Total                      | N/A        | N/A      | N/A        | N/A       | 65             | 5.716799%                              | 0.002625%                                 |
| DMPK Cas9 nuclease         |            |          |            |           |                |                                        |                                           |
| Translocation hot-spot     | Bait       |          | Prey       |           | Count of Reads | Frequency in total split reads (26069) | Frequency in total mapped reads (6596133) |
|                            | chromosome | position | chromosome | position  |                |                                        |                                           |
| #1                         | 19         | 46273300 | 1          | 227059400 | 3              | 0.0115079%                             | 0.000045%                                 |
| #2                         | 19         | 46273600 | 14         | 62534300  | 3              | 0.0115079%                             | 0.000045%                                 |
| #3                         | 19         | 46273600 | 15         | 68132400  | 25             | 0.0958993%                             | 0.000379%                                 |
|                            | 19         | 46273600 | 15         | 68132500  | 44             | 0.1687828%                             | 0.000667%                                 |
|                            | 19         | 46273600 | 15         | 68132600  | 21             | 0.0805554%                             | 0.000318%                                 |
| #4                         | 19         | 46273600 | 17         | 79579500  | 3              | 0.0115079%                             | 0.000045%                                 |
| #5                         | 19         | 46273600 | 19         | 2136700   | 3              | 0.0115079%                             | 0.000045%                                 |
| #6                         | 19         | 46273600 | X          | 15717100  | 3              | 0.0115079%                             | 0.000045%                                 |
| Total                      | N/A        | N/A      | N/A        | N/A       | 105            | 0.4027772%                             | 0.001592%                                 |
| DMPK Cas9 nickase          |            |          |            |           |                |                                        |                                           |
| Translocation hot-spot     | Bait       |          | Prey       |           | Count of Reads | Frequency in total split reads (30619) | Frequency in total mapped reads (5485316) |
|                            | chromosome | position | chromosome | position  |                |                                        |                                           |
| #1                         | 19         | 46273600 | 2          | 27615800  | 3              | 0.009798%                              | 0.000055%                                 |
| #2                         | 19         | 46273600 | 2          | 33141300  | 3              | 0.009798%                              | 0.000055%                                 |
| #3                         | 19         | 46273600 | 3          | 3075400   | 3              | 0.009798%                              | 0.000055%                                 |
| #4                         | 19         | 46273600 | 5          | 78782800  | 4              | 0.013064%                              | 0.000073%                                 |
| #5                         | 19         | 46273600 | 5          | 179558400 | 3              | 0.009798%                              | 0.000055%                                 |
| #6                         | 19         | 46273600 | 7          | 134156100 | 3              | 0.009798%                              | 0.000055%                                 |
| #7                         | 19         | 46273600 | 8          | 1754600   | 3              | 0.009798%                              | 0.000055%                                 |
| #8                         | 19         | 46273600 | 9          | 134700900 | 3              | 0.009798%                              | 0.000055%                                 |
| #9                         | 19         | 46273600 | 9          | 139685700 | 3              | 0.009798%                              | 0.000055%                                 |
| #10                        | 19         | 46273600 | 11         | 33757700  | 3              | 0.009798%                              | 0.000055%                                 |
| #11                        | 19         | 46273600 | 11         | 74950100  | 3              | 0.009798%                              | 0.000055%                                 |
| #12                        | 19         | 46273600 | 12         | 74399000  | 3              | 0.009798%                              | 0.000055%                                 |
| #13                        | 19         | 46273600 | 15         | 56252500  | 3              | 0.009798%                              | 0.000055%                                 |
| #14                        | 19         | 46273600 | 15         | 68132500  | 20             | 0.065319%                              | 0.000365%                                 |
|                            | 19         | 46273600 | 15         | 68132600  | 15             | 0.048989%                              | 0.000273%                                 |
| #15                        | 19         | 46273600 | 16         | 1481600   | 3              | 0.009798%                              | 0.000055%                                 |
| #16                        | 19         | 46273600 | 16         | 2296500   | 4              | 0.013064%                              | 0.000073%                                 |
| #17                        | 19         | 46273600 | 16         | 22328400  | 3              | 0.009798%                              | 0.000055%                                 |
| #18                        | 19         | 46273600 | 17         | 36041800  | 3              | 0.009798%                              | 0.000055%                                 |
| #19                        | 19         | 46273600 | 17         | 39620700  | 3              | 0.009798%                              | 0.000055%                                 |
| #20                        | 19         | 46273600 | 17         | 46178700  | 13             | 0.042457%                              | 0.000237%                                 |
| #21                        | 19         | 46273600 | 17         | 80023600  | 3              | 0.009798%                              | 0.000055%                                 |
| #22                        | 19         | 46273600 | 19         | 2312500   | 3              | 0.009798%                              | 0.000055%                                 |
| #23                        | 19         | 46273600 | 19         | 17531800  | 3              | 0.009798%                              | 0.000055%                                 |
| #24                        | 19         | 46273600 | 20         | 34892400  | 3              | 0.009798%                              | 0.000055%                                 |
| #25                        | 19         | 46273600 | 20         | 39292200  | 3              | 0.009798%                              | 0.000055%                                 |
| Total                      | N/A        | N/A      | N/A        | N/A       | 119            | 0.388648%                              | 0.002169%                                 |

Table S2

| Possible on-target large deletions |                              |            |                 |            |                    |
|------------------------------------|------------------------------|------------|-----------------|------------|--------------------|
| RAG1                               | Chromosome 11 reference span |            |                 |            | Estimated          |
| Read pair #                        | Left alignment               |            | Right alignment |            | deletion size (bp) |
| 1                                  | 36587558                     | - 36587665 | 36594893        | - 36595029 | 7227               |
| 2                                  | 36589939                     | - 36590121 | 36594878        | - 36595029 | 4756               |
| 3                                  | 36591473                     | - 36591523 | 36594888        | - 36595029 | 3364               |
| 4                                  | 36592346                     | - 36592438 | 36594884        | - 36595029 | 2445               |
| 5                                  | 36592453                     | - 36592667 | 36594880        | - 36595029 | 2212               |
| 6                                  | 36592498                     | - 36592666 | 36594897        | - 36595029 | 2230               |
| 7                                  | 36592760                     | - 36592868 | 36594880        | - 36595029 | 2011               |
| 8                                  | 36592766                     | - 36592902 | 36594882        | - 36595029 | 1979               |
| 9                                  | 36592803                     | - 36592967 | 36594884        | - 36595029 | 1916               |
| 10                                 | 36593334                     | - 36593418 | 36594886        | - 36595029 | 1467               |
| 11                                 | 36593520                     | - 36593663 | 36594880        | - 36595029 | 1216               |
| 12                                 | 36593683                     | - 36593793 | 36594880        | - 36595029 | 1086               |
| 13                                 | 36593729                     | - 36593829 | 36594883        | - 36595029 | 1053               |
| 14                                 | 36593691                     | - 36593857 | 36594879        | - 36595029 | 1021               |
| 15                                 | 36593735                     | - 36593852 | 36594880        | - 36595029 | 1027               |
| 16                                 | 36593697                     | - 36593880 | 36594878        | - 36595029 | 997                |
| 17                                 | 36593903                     | - 36594002 | 36594883        | - 36595029 | 880                |
| 18                                 | 36593933                     | - 36594119 | 36594878        | - 36595029 | 758                |
| 19                                 | 36593993                     | - 36594125 | 36594878        | - 36595029 | 752                |
| 20                                 | 36594085                     | - 36594162 | 36594883        | - 36595029 | 720                |

  

| DMPK nuclease | Chromosome 19 reference span |            |                 |            | Estimated          |
|---------------|------------------------------|------------|-----------------|------------|--------------------|
| Read pair #   | Left alignment               |            | Right alignment |            | deletion size (bp) |
| 1             | 46253337                     | - 46253481 | 46273561        | - 46273724 | 20079              |
| 2             | 46253371                     | - 46253536 | 46273576        | - 46273724 | 20039              |
| 3             | 46253407                     | - 46253536 | 46273557        | - 46273724 | 20020              |
| 4             | 46258843                     | - 46258880 | 46273567        | - 46273724 | 14686              |
| 5             | 46259353                     | - 46259504 | 46273568        | - 46273724 | 14063              |
| 6             | 46260312                     | - 46260463 | 46273557        | - 46273724 | 13093              |
| 7             | 46260705                     | - 46260837 | 46273576        | - 46273724 | 12738              |
| 8             | 46260851                     | - 46260918 | 46273557        | - 47273724 | 12638              |
| 9             | 46261728                     | - 46261835 | 46273572        | - 46273724 | 11736              |
| 10            | 46262176                     | - 46262323 | 46273574        | - 46273724 | 11250              |
| 11            | 46262817                     | - 46262964 | 46273567        | - 46273723 | 10602              |
| 12            | 46263637                     | - 46263763 | 46273557        | - 46273724 | 9793               |
| 13            | 46264698                     | - 46264794 | 46273574        | - 46273724 | 8779               |
| 14            | 46264843                     | - 46264947 | 46273557        | - 46273724 | 8609               |
| 15            | 46264883                     | - 46264975 | 46273563        | - 46273724 | 8587               |
| 16            | 46264962                     | - 46265059 | 46273567        | - 46273723 | 8507               |
| 17            | 46265040                     | - 46265226 | 46273571        | - 46273724 | 8344               |
| 18            | 46265197                     | - 46265232 | 46273561        | - 46273724 | 8328               |
| 19            | 46265244                     | - 46265422 | 46273567        | - 46273724 | 8144               |
| 20            | 46266027                     | - 46266137 | 46273571        | - 46273724 | 7433               |

  

| DMPK nickase | Chromosome 19 reference span |            |                 |            | Estimated          |
|--------------|------------------------------|------------|-----------------|------------|--------------------|
| Read pair #  | Left alignment               |            | Right alignment |            | deletion size (bp) |
| 1            | 46209259                     | - 46209340 | 46273599        | - 46273599 | 64258              |
| 2            | 46210852                     | - 46210917 | 46273602        | - 46273602 | 62684              |
| 3            | 46211747                     | - 46211796 | 46273558        | - 46273558 | 61761              |
| 4            | 46215181                     | - 46215320 | 46273611        | - 46273611 | 58290              |
| 5            | 46217317                     | - 46217406 | 46273611        | - 46273611 | 56204              |
| 6            | 46227014                     | - 46227072 | 46273590        | - 46273590 | 46517              |
| 7            | 46233099                     | - 46233157 | 46273624        | - 46273624 | 40466              |
| 8            | 46235123                     | - 46235235 | 46273605        | - 46273605 | 38369              |
| 9            | 46237678                     | - 46237802 | 46273614        | - 46273614 | 35811              |
| 10           | 46244211                     | - 46244330 | 46273612        | - 46273612 | 29281              |
| 11           | 46245267                     | - 46245398 | 46273612        | - 46273612 | 28213              |
| 12           | 46246492                     | - 46246541 | 46273627        | - 46273627 | 27085              |
| 13           | 46246629                     | - 46246754 | 46273608        | - 46273608 | 26853              |
| 14           | 46248913                     | - 46248984 | 46273617        | - 46273617 | 24632              |
| 15           | 46249727                     | - 46249849 | 46273599        | - 46273599 | 23749              |
| 16           | 46250937                     | - 46251086 | 46273601        | - 46273601 | 22514              |
| 17           | 46251222                     | - 46251334 | 46273611        | - 46273611 | 22276              |
| 18           | 46251995                     | - 46252114 | 46273606        | - 46273606 | 21491              |
| 19           | 46252333                     | - 46252435 | 46273592        | - 46273592 | 21156              |
| 20           | 46252490                     | - 46252613 | 46273613        | - 46273613 | 20999              |

Table S3

| Primers and sgRNAs used in this paper         |                                 |          |                                |            |                                 |  |
|-----------------------------------------------|---------------------------------|----------|--------------------------------|------------|---------------------------------|--|
| DMPK PCR primers                              |                                 |          |                                |            |                                 |  |
| Forward                                       | CGACTCCGGGGCCCCGTTGGAAGACT      |          |                                | Reverse    | TGCACAAGAAAGCTTTGCAC            |  |
| Primers for T7 endonuclease I assay           |                                 |          |                                |            |                                 |  |
|                                               | Locus                           | Name     | Forward                        |            | Reverse                         |  |
| on-target                                     | chr19:-46273705                 | DMPK     | CGACTCCGGGGCCCCGTTGGAAGACT     |            | TTCCCGAGTAAGCAGGCAGAG           |  |
| off-target<br>for<br>5' guide 3               | chr1:+241682887                 | 5' OFT 1 | CCGCCAGAAATCTACCCAAG           |            | GTTACCTCAAACGCCCCGG             |  |
|                                               | chr15:-32274042                 | 5' OFT 2 | GACAGGTGCCAGTGGATGTAAC         |            | CCTGATGGCACACTTAGACTGAC         |  |
|                                               | chr13:-43724123                 | 5' OFT 3 | CTTTACCATCTGTGTGTCCTCTC        |            | GAAACCAGAAGGGGCTGGTTAAG         |  |
|                                               | chr20:+2682376                  | 5' OFT 4 | ATTTGGCCTGAGCACTTGCAGGG        |            | GCAGTCCTTCAAGTTGAGGCC           |  |
|                                               | chr9:-139929364                 | 5' OFT 5 | TGCTCACACACCAGGAGCT            |            | TCAGCCTCACACCACCCAT             |  |
| off-target<br>for<br>3' guide 2               | chr17:+76322345                 | 3' OFT 1 | CTCGGCTTTCAGTGGCCTA            |            | TGGATTATTAGTTGGCTCAGGC          |  |
|                                               | chr10:+7791015                  | 3' OFT 2 | CCGTTCCAAACACTAGATCCGTTTC      |            | ACTCCTGGCCTCAAGTGGTC            |  |
|                                               | chr7:+120984995                 | 3' OFT 3 | CCCATGATCATGGCCACAC            |            | GGCACAGTTACAGGAATTGTGGC         |  |
|                                               | chr16:+63838238                 | 3' OFT 4 | CTGGAGAAGCAACAGAGATTCAAGAAAGAC |            | GGCCATAGTAGAAGTCAGAGGTG         |  |
|                                               | chr15:+40318690                 | 3' OFT 5 | GAGGTGGGAGGATTGCTTGAG          |            | CCTACCCATATGGTTGATACTCCC        |  |
| sgRNAs for Cas9 nuclease                      |                                 |          |                                |            |                                 |  |
| Name                                          | Protospacer sequence (5' to 3') |          | PAM                            | Strand     |                                 |  |
| 5' guide 1                                    | CGAGCCCCGTTCCGCGGCCG            |          | CGG                            | -          |                                 |  |
| 5' guide 2                                    | GCCGGCGAACGGGGCTCGAA            |          | GGG                            | +          |                                 |  |
| 5' guide 3                                    | ACCCTTCGAGCCCCGTTTCGC           |          | CGG                            | -          |                                 |  |
| 3' guide 1                                    | GCTGAGGCCCTGACGTGGAT            |          | GGG                            | +          |                                 |  |
| 3' guide 2                                    | TTGCGAACCAACGATAGGTG            |          | GGG                            | -          |                                 |  |
| 3' guide 3                                    | GCACTTTGCGAACCAACGAT            |          | AGG                            | -          |                                 |  |
| RAG1A                                         | GCCTCTTCCCACCCACCT              |          | GGG                            | +          |                                 |  |
| sgRNA pairs for Cas9 nickase (double nicking) |                                 |          |                                |            |                                 |  |
|                                               | Upstream                        |          |                                | Downstream |                                 |  |
| Name                                          | Protospacer sequence (5' to 3') |          | PAM                            | Strand     | Protospacer sequence (5' to 3') |  |
| Nick 1                                        | AGGGGGCGGGCCGGATCAC             |          | AGG                            | -          | CGGGTCCGCGGCCGGCGAAC            |  |
| Nick 2                                        | CTCCCCGGCCGCTAGGGGGC            |          | GGG                            | -          | GCCGGCGAACGGGGCTCGAA            |  |
| Nick 3                                        | GCAGTTTGCCCATCCACGTC            |          | AGG                            | -          | GCCTGGGAAGGCAGCAAGCC            |  |
| Nick 4                                        | AGGATGGAACACGGACGGCC            |          | CGG                            | -          | CACGCACCCCCACCTATCGT            |  |
| Nick 5                                        | GCGGCTTCTGTGCCGTGCC             |          | CGG                            | -          | GTTACAACCGCTCCGAGCG             |  |
| Nick 6                                        | CGCTCGGAGCGTTGTGAAC             |          | TGG                            | -          | GATCCGGGCGGCCCCCTAG             |  |
| Nick 7                                        | CTCCCCGGCCGCTAGGGGGC            |          | GGG                            | -          | CGGGTCCGCGGCCGGCGAAC            |  |
| Nick 8                                        | CCTCCCTCCCCGGCCGCTAG            |          | GGG                            | -          | CGGGTCCGCGGCCGGCGAAC            |  |
| Nick 9                                        | CCTCCCTCCCCGGCCGCTAG            |          | GGG                            | -          | GCCGGCGAACGGGGCTCGAA            |  |
| sgRNAs for CRISPR interference                |                                 |          |                                |            |                                 |  |
| Name                                          | Protospacer sequence (5' to 3') |          | PAM                            | Strand     |                                 |  |
| i guide 1                                     | AGGAGGCCTCGGCCGGCCGCA           |          | GAGAG                          | +          |                                 |  |
| i guide 2                                     | GGGGCTCCAGCCCCAGGAAGC           |          | CCGGGT                         | -          |                                 |  |
| i guide 3                                     | TACGTGCCGACTTCTTGACAG           |          | TGGGGT                         | +          |                                 |  |

Table S4

| Primers and adaptors used for LAM-HTGTS                      |                                                                |
|--------------------------------------------------------------|----------------------------------------------------------------|
| Bio-LAM-PCR primers                                          |                                                                |
| DMPK                                                         | Biotin- <b>GCCAACTCACCGCAGTCTGG</b>                            |
| RAG1                                                         | Biotin-AGGACTGCTGGAGATTGCTC                                    |
| Oligos for bridge adaptor                                    |                                                                |
| Upper oligo                                                  | GCGACTATAGGGCACGCGTGGNNNNNN-NH <sub>2</sub>                    |
| Lower oligo                                                  | Phosphorylation-CCACGCGTCCCCTATAGTCGC-NH <sub>2</sub>          |
| "N" means random nucleotide.                                 |                                                                |
| Nested PCR primers                                           |                                                                |
| DMPK forward                                                 | TCGTCGGCAGCGTCAGATGTGTATAAGAGACAG <b>CCGGGGCCCCGTTGGAAGACT</b> |
| DMPK reverse                                                 | GTCTCGTGGGCTCGGAGATGTGTATAAGAGACAGGCGACTATAGGGCACGCGTGG        |
| RAG1 forward                                                 | TCGTCGGCAGCGTCAGATGTGTATAAGAGACAGGAGAGGGTTTCCCTCAAAG           |
| RAG1 reverse                                                 | GTCTCGTGGGCTCGGAGATGTGTATAAGAGACAGGCGACTATAGGGCACGCGTGG        |
| Dual-index primers                                           |                                                                |
| 517                                                          | AATGATACGGCGACCACCGAGATCTACACGCGTAAGATCGTCGGCAGCGTC            |
| 504                                                          | AATGATACGGCGACCACCGAGATCTACACAGAGTAGATCGTCGGCAGCGTC            |
| 507                                                          | AATGATACGGCGACCACCGAGATCTACACAAGGAGTATCGTCGGCAGCGTC            |
| 508                                                          | AATGATACGGCGACCACCGAGATCTACACCTAAGCCTTCGTCGGCAGCGTC            |
| 701                                                          | CAAGCAGAAGACGGCATAACGAGATTCGCCTTAGTCTCGTGGGCTCGG               |
| 703                                                          | CAAGCAGAAGACGGCATAACGAGATTTCTGCCTGTCTCGTGGGCTCGG               |
| 707                                                          | CAAGCAGAAGACGGCATAACGAGATGTAGAGAGGTCTCGTGGGCTCGG               |
| 708                                                          | CAAGCAGAAGACGGCATAACGAGATCCTCTCTGGTCTCGTGGGCTCGG               |
| Red characters indicate <i>DMPK</i> locus specific sequence. |                                                                |
